# Supplementary material for: Gate modulation of proton transport in a nanopore
Source: Royal Society of Chemistry journal article supplement (doi:10.1039/c5cp07568h), 2016-01-01
Supplement: c5cp07568h1.pdf [file c5cp07568h1.pdf]

## Electronic Supplementary Information (ESI)

### Gate Modulation of Proton Transport in a Nanopore

Lanju Mei,<sup>1,+</sup> Li-Hsien Yeh,<sup>2,+,\*</sup> and Shizhi Qian,<sup>1,\*</sup>

<sup>1</sup>Institute of Micro/Nanotechnology, Old Dominion University, Norfolk, VA 23529, USA

<sup>2</sup>Department of Chemical and Materials Engineering, National Yunlin University of Science  
and Technology, Yunlin 64002, Taiwan

\* Corresponding authors:

Fax: +886-5-5312071; E-mail: [lhyeh@yuntech.edu.tw](mailto:lhyeh@yuntech.edu.tw) (Li-Hsien Yeh),

[sqian@odu.edu](mailto:sqian@odu.edu) (Shizhi Qian)

### Detailed Derivation of eqn (3) and (5) in the Main Text

The electrical potential,  $\phi$ , within the liquid phase ( $0 < r < R_n - \delta_s$ ) can be described by

$$\frac{1}{r} \frac{d}{dr} \left( r \frac{d\phi}{dr} \right) = -\frac{\rho_e}{\varepsilon_f}, \quad (\text{R1})$$

where  $\rho_e$  is the mobile space charge density and can be expressed as

$$\rho_e = \sum_{i=1}^4 Fz_i C_{ic} \exp \left[ \frac{z_i F (\phi_c - \phi)}{RT} \right]. \quad (\text{R2})$$

In the above,  $\phi_c$  is the electric potential at the center of the nanopore, and  $C_{ic}$  is the concentration of the  $i^{\text{th}}$  ionic species at the center of the nanopore, which can be described by,

$$C_{ic} = C_{i0} \exp \left[ -\frac{z_i F (\phi_c - \phi_0)}{RT} \right]. \quad (\text{R3})$$

Here  $\phi_0$  is the reference potential in the reservoirs far away from the charged nanopore and typically vanishes (i.e.,  $\phi_0 = 0$ ). Substituting eqn (R3) and (R2) into eqn (R1) gets

$$\frac{1}{r} \frac{d}{dr} \left( r \frac{d\phi}{dr} \right) = -\frac{1}{\varepsilon_f} \sum_{i=1}^4 Fz_i C_{i0} \exp \left( -\frac{z_i F \phi}{RT} \right), \quad (\text{R4})$$

which is the eqn (3) in the main text. Suppose that  $C_{t0} = C_{10} + C_{40} = C_{20} + C_{30}$  is the bulk concentration of net cations (or anions). Due to the electroneutrality of bulk solution (i.e.,  $C_{t0} = C_{10} + C_{40} = C_{20} + C_{30}$ ) in the reservoirs far away from the charged nanopore, expanding the right term of eqn (R4) yields

$$\begin{aligned}
& -\frac{1}{\varepsilon_f} \sum_{i=1}^4 Fz_i C_{i0} \exp\left(-\frac{z_i F \phi}{RT}\right) \\
&= -\frac{F}{\varepsilon_f} \left[ z_1 C_{10} \exp\left(-\frac{z_1 F \phi}{RT}\right) + z_2 C_{20} \exp\left(-\frac{z_2 F \phi}{RT}\right) + z_3 C_{30} \exp\left(-\frac{z_3 F \phi}{RT}\right) + z_4 C_{40} \exp\left(-\frac{z_4 F \phi}{RT}\right) \right] \\
&= -\frac{zF}{\varepsilon_f} \left[ C_{10} \exp\left(-\frac{zF \phi}{RT}\right) - C_{20} \exp\left(\frac{zF \phi}{RT}\right) - C_{30} \exp\left(\frac{zF \phi}{RT}\right) + C_{40} \exp\left(-\frac{zF \phi}{RT}\right) \right] \\
&= \frac{zF}{\varepsilon_f} \left[ (C_{20} + C_{30}) \exp\left(\frac{zF \phi}{RT}\right) - (C_{10} + C_{40}) \exp\left(-\frac{zF \phi}{RT}\right) \right] \\
&= \frac{2zFC_{i0}}{\varepsilon_f} \left[ \frac{\exp\left(\frac{zF \phi}{RT}\right) - \exp\left(-\frac{zF \phi}{RT}\right)}{2} \right] \\
&= \left(\frac{RT}{zF}\right) \left(\frac{2z^2 F^2 C_{i0}}{\varepsilon_f RT}\right) \sinh\left(\frac{zF \phi}{RT}\right) \\
&= \frac{RT \kappa^2}{zF} \sinh\left(\frac{zF \phi}{RT}\right)
\end{aligned} \tag{R5}$$

where  $z = z_1 = -z_2 = -z_3 = z_4$  and  $\kappa^{-1} = (\varepsilon_f RT / 2z^2 F^2 C_{i0})^{1/2}$  is the Debye length. By substituting eqn (R5) into eqn (R4), we obtain eqn (5) in the main text,

$$\frac{1}{r} \frac{d}{dr} \left( r \frac{d\phi}{dr} \right) = \frac{RT \kappa^2}{zF} \sinh\left(\frac{zF \phi}{RT}\right). \tag{R6}$$

### Gate Modulation of the Zeta Potential of the nanopore

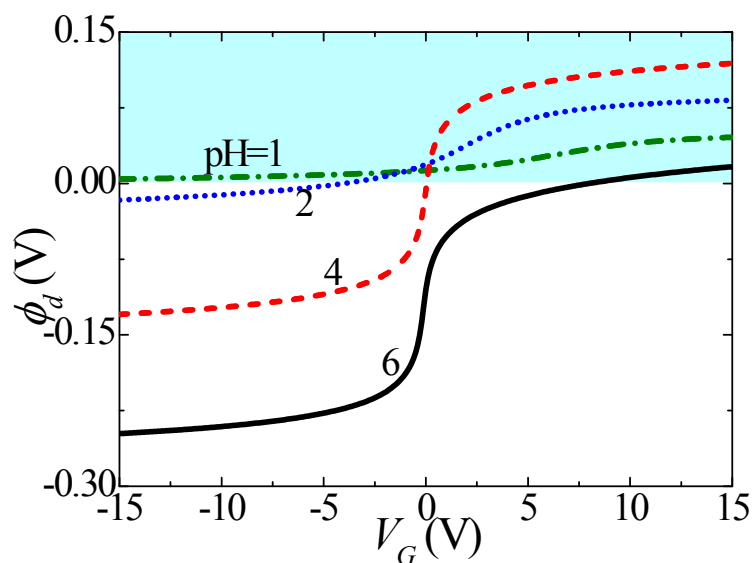

**Figure S1.** Gate modulation of the zeta potential,  $\phi_d$ , of the nanopore as a function of  $V_G$  for various pHs without background salt ( $C_{salt} = 0$  mM). The blue region highlights where the modulated  $\phi_d$  is positive.

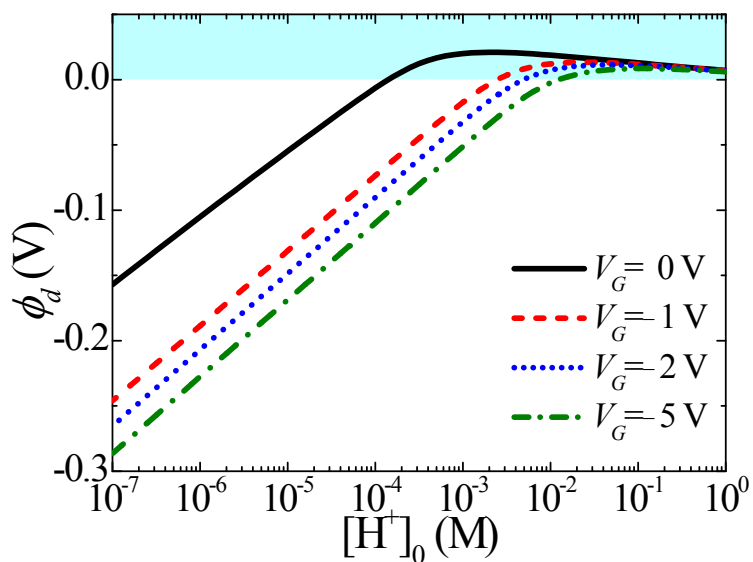

**Figure S2.** Gate modulation of the zeta potential,  $\phi_d$ , of the nanopore as a function of the molar concentration of protons,  $[H^+]_0$ , for various levels of  $V_G$  without background salt ( $C_{salt} = 0$  mM). The blue region highlights where the modulated  $\phi_d$  is positive.

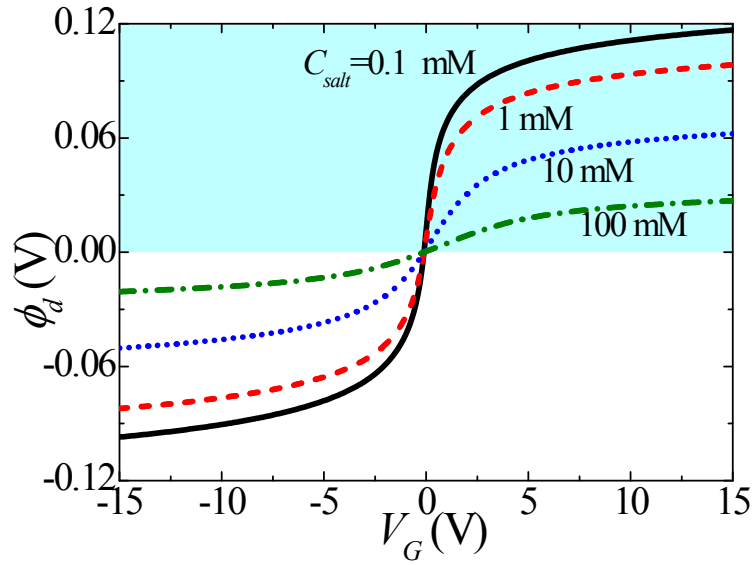

**Figure S3.** Gate modulation of the zeta potential,  $\phi_d$ , of the nanopore as a function of  $V_G$  for various background salt concentrations  $C_{salt}$  at pH = 3.5. The blue region highlights where the modulated  $\phi_d$  is positive.

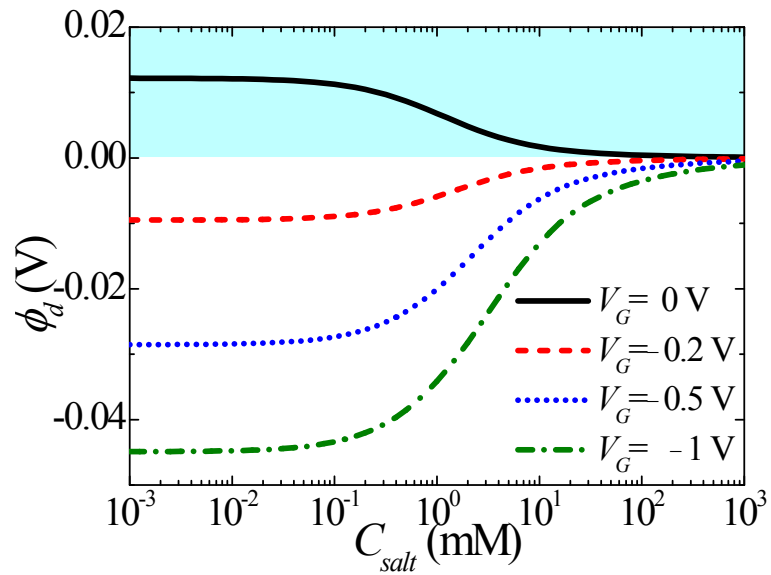

**Figure S4.** Gate modulation of the zeta potential,  $\phi_d$ , of the nanopore as a function of the background salt concentration  $C_{salt}$  for various levels of  $V_G$  at pH = 3.5. The blue region highlights where the modulated  $\phi_d$  is positive.
